# Supplementary material
Source: publisher figshare collection journal article supplement (https://frontiersin.figshare.com/ndownloader/files/26148872)
Supplement: Supplementary file 1 [file 26148872]

## Sheet: Microbasin Maxent
Basin name	Number of microbasins	Minimum suitability	Maximum suitability	Range	Average suitability	Standart deviation
Asi	6706	0.105676	0.560307	0.454631	0.306057	0.095073
KonyaKapalı	43652	0.22097	0.64062	0.41965	0.354694	0.083221
Fırat ve Dicle	154394	0.10228	0.709215	0.606935	0.363595	0.124675
Ceyhan	18840	0.105932	0.630002	0.52407	0.383149	0.144286
VanGölü	15722	0.19302	0.594277	0.401257	0.394991	0.082432
Aras	25110	0.090755	0.600579	0.509824	0.432309	0.10099
Burdur	5470	0.265996	0.546989	0.280993	0.432722	0.039888
Akarçay	7027	0.301998	0.559534	0.257536	0.434985	0.050082
Sakarya	56516	0.283139	0.665549	0.38241	0.453059	0.090599
Kızılırmak	73611	0.248671	0.689306	0.440635	0.454606	0.076926
BüyükMenderes	22600	0.244898	0.604839	0.359941	0.454738	0.053262
DoğuAkdeniz	18639	0.113373	0.64062	0.527247	0.462922	0.095028
BatıAkdeniz	17927	0.177724	0.608474	0.43075	0.465238	0.071665
Seyhan	18739	0.12757	0.636801	0.509231	0.466826	0.139257
Antalya	17428	0.132982	0.627135	0.494153	0.480463	0.108753
Gediz	15086	0.245601	0.606978	0.361377	0.498123	0.055065
KüçükMenderes	6034	0.374974	0.603761	0.228787	0.500514	0.053867
Yeşilırmak	35664	0.368024	0.68422	0.316196	0.51662	0.060841
MeriçErgene	13254	0.460048	0.630307	0.170259	0.526958	0.024335
KuzeyEge	8719	0.331873	0.625633	0.293761	0.54648	0.052641
Çoruh	18317	0.341194	0.634875	0.293681	0.556535	0.053301
Susurluk	21686	0.405148	0.659446	0.254298	0.563123	0.038483
BatıKaradeniz	26284	0.442396	0.739191	0.296795	0.589512	0.051229
Marmara	20695	0.475102	0.711563	0.236461	0.59739	0.023481
DoğuKaradeniz	20664	0.494135	0.688955	0.19482	0.612928	0.032596

## Sheet: ORS
Basin name	Mean MaxEnt	BRA	CCA	ORS BRA	ORS BRA+CCA			maxent	BRA	cca	ORS bra
BatıKaradeniz	0.589512	31	29	18.2749	17.0958			DoğuKaradeniz	BatıKaradeniz	BatıKaradeniz	BatıKaradeniz
DoğuKaradeniz	0.612928	28	28	17.162	17.162			Marmara	DoğuKaradeniz	DoğuKaradeniz	DoğuKaradeniz
Marmara	0.59739	27	21	16.1295	12.5452			BatıKaradeniz	MeriçErgene	MeriçErgene	Marmara
MeriçErgene	0.526958	28	24	14.7548	12.647			Susurluk	Fırat ve Dicle	Çoruh	MeriçErgene
Çoruh	0.556535	24	24	13.3568	13.3568			Çoruh	Marmara	Fırat ve Dicle	Çoruh
Susurluk	0.563123	22.5	18.5	12.6703	10.4178			KuzeyEge	BatıAkdeniz	Marmara	Susurluk
Yeşilırmak	0.51662	22.5	18.5	11.6239	9.55747			MeriçErgene	Sakarya	Aras	Yeşilırmak
BatıAkdeniz	0.465238	24.5	20.5	11.3983	9.53738			Yeşilırmak	Çoruh	BatıAkdeniz	BatıAkdeniz
Sakarya	0.453059	24.5	16.5	11.0999	7.47547			KüçükMenderes	VanGölü	VanGölü	Sakarya
KuzeyEge	0.54648	19	17	10.3831	9.29016			Gediz	Susurluk	Susurluk	KuzeyEge
Antalya	0.480463	21	15	10.0897	7.20694			Antalya	Yeşilırmak	Yeşilırmak	Antalya
Fırat ve Dicle	0.363595	27.5	23.5	9.99886	8.54448			Seyhan	Antalya	KuzeyEge	Fırat ve Dicle
Kızılırmak	0.454606	21	13	9.54673	5.90988			BatıAkdeniz	Kızılırmak	Sakarya	Kızılırmak
Seyhan	0.466826	20	14	9.33652	6.53556			DoğuAkdeniz	Aras	Gediz	Seyhan
VanGölü	0.394991	23.5	19.5	9.28229	7.70232			BüyükMenderes	Seyhan	Antalya	VanGölü
Aras	0.432309	21	21	9.07849	9.07849			Kızılırmak	KuzeyEge	Seyhan	Aras
Gediz	0.498123	18	16	8.96621	7.96997			Sakarya	DoğuAkdeniz	Ceyhan	Gediz
DoğuAkdeniz	0.462922	19	13	8.79552	6.01799			Akarçay	Gediz	Asi	DoğuAkdeniz
BüyükMenderes	0.454738	17.5	13.5	7.95791	6.13896			Burdur	Ceyhan	BüyükMenderes	BüyükMenderes
Ceyhan	0.383149	18	14	6.89668	5.36409			Aras	Asi	Kızılırmak	Ceyhan
KüçükMenderes	0.500514	13.5	11.5	6.75694	5.75591			VanGölü	BüyükMenderes	DoğuAkdeniz	KüçükMenderes
Burdur	0.432722	15	9	6.49083	3.8945			Ceyhan	KonyaKapalı	KüçükMenderes	Burdur
Akarçay	0.434985	14	8	6.08979	3.47988			Fırat ve Dicle	Burdur	Burdur	Akarçay
KonyaKapalı	0.354694	16	6	5.6751	2.12816			KonyaKapalı	Akarçay	Akarçay	KonyaKapalı
Asi	0.306057	18	14	5.50903	4.2848			Asi	KüçükMenderes	KonyaKapalı	Asi

## Sheet: Sayfa1
				Species	Basin	OSR1	OSR2	MB	EOO	P#	EOO*P#	LogL2	RVS1	RVS2
	EOO	AOO		Salmo opimus [18]	Ceyhan	6.89668	5.36409	0.446443	2513.4	10	25134	4.40026	0.699726	0.544231	0.155495
Salmo abanticus	8	8		Salmo opimus [14]	Eastern Mediterranean	8.79552	6.01799	0.534568	861.5	10	8615	3.93526	1.19479	0.817488	0.377302
Salmo chilo	89.7	16		Salmo coruhensis [11]	Sakarya	11.0999	7.47547	0.603437	21225.7	15	318386	5.50295	1.21719	0.819738	0.397449
Salmo coruhensis	21225.7	76		Salmo coruhensis [20]	Yeşilırmak	11.6239	9.55747	0.506864	21225.7	15	318386	5.50295	1.07065	0.880315	0.190338
Salmo euphrataeus	8	8		Salmo opimus [13]	Antalya	10.0897	7.20694	0.48774	488	10	4880	3.68842	1.33422	0.953014	0.381206
Salmo fahrettini	8	8		Salmo okumusi	Euphrates	9.99886	8.54448	0.4287	2214	2	4428	3.64621	1.17561	1.00461	0.170998
Salmo kottelati	46.8	20		Salmo rizeensis [20]	Yeşilırmak	11.6239	9.55747	0.522235	5132.9	9	46196.1	4.66461	1.30138	1.07003	0.231357
Salmo labecula	215.5	28		Salmo coruhensis [2]	Marmara	16.1295	12.5452	0.579166	21225.7	15	318386	5.50295	1.69757	1.32034	0.377239
Salmo munzuricus	3.5	12		Salmo coruhensis [23]	Çoruh	13.3568	13.3568	0.580756	21225.7	15	318386	5.50295	1.40962	1.40962	0
Salmo okumusi	2214	16		Salmo chilo	Ceyhan	6.89668	5.36409	0.5138	89.7	1	89.7	1.95279	1.81459	1.41135	0.403242
Salmo opimus	5675.9	60		Salmo labecula [17]	Seyhan	9.33652	6.53556	0.586382	215.5	2	431	2.63448	2.07812	1.45469	0.623437
Salmo platycephalus	78.8	12		Salmo labecula [13]	Antalya	10.0897	7.20694	0.5799	215.5	2	431	2.63448	2.22095	1.58639	0.634556
Salmo rizeensis	5132.9	24		Salmo rizeensis [23]	Çoruh	13.3568	13.3568	0.563695	5132.9	9	46196.1	4.66461	1.61411	1.61411	0
Salmo tigridis	135.7	12		Salmo coruhensis [22]	Eastern Black Sea	17.162	17.162	0.585006	21225.7	15	318386	5.50295	1.82445	1.82445	0
				Salmo platycephalus	Seyhan	9.33652	6.53556	0.574	75.8	1	75.8	1.87967	2.85112	1.99578	0.855336
				Salmo tigridis	Euphrates	9.99886	8.54448	0.5763	135.7	2	271.4	2.43361	2.36782	2.02341	0.34441
				Salmo rizeensis [22]	Eastern Black Sea	17.162	17.162	0.609796	5132.9	9	46196.1	4.66461	2.24356	2.24356	0
				Salmo rizeensis [12]	Western Black Sea	18.2749	17.0958	0.647398	5132.9	9	46196.1	4.66461	2.53636	2.37272	0.163636
				Salmo kottelati	Western Mediterranean	11.3983	9.53738	0.5473	46.8	1	46.8	1.67025	3.73496	3.12517	0.60979
				Salmo fahrettini	Euphrates	9.99886	8.54448	0.4737	8	1	8	0.90309	5.24473	4.48186	0.762869
				Salmo euphrataeus	Euphrates	9.99886	8.54448	0.5615	8	1	8	0.90309	6.21683	5.31257	0.904267
				Salmo munzuricus	Euphrates	9.99886	8.54448	0.5316	4	1	4	0.60206	8.82868	7.54451	1.28417
				Salmo abanticus	Western Black Sea	18.2749	17.0958	0.551987	8	1	8	0.90309	11.17	10.4493	0.720643
